# Supplementary material for: Gain and loss of TASK3 channel function and its regulation by novel variation cause KCNK9 imprinting syndrome
Source: PubMed Central journal article supplement (PMC9195326; doi:10.1186/s13073-022-01064-4), 2022-06-13
Supplement: 13073_2022_1064_MOESM5_ESM.pdf [file 13073_2022_1064_MOESM5_ESM.pdf]

**Gain and loss of TASK3 channel function and its regulation by novel variation  
cause *KCNK9* imprinting syndrome**

**Additional file 5**

**Table S2. Seizure and seizure-like episodes in affected individuals with at least one afebrile seizure.** y = years, m = months, d = days, EEG = electroencephalogram

| Identifier             | Age at febrile episode | Age at afebrile episode | Episode description                                                | EEG findings                                                                                                                                                                                   | Treatment                                             |
|------------------------|------------------------|-------------------------|--------------------------------------------------------------------|------------------------------------------------------------------------------------------------------------------------------------------------------------------------------------------------|-------------------------------------------------------|
| P11.1                  | 3.5y                   |                         | Status epilepticus                                                 |                                                                                                                                                                                                |                                                       |
|                        |                        | 8y                      | Tonic seizures                                                     | Spike and wave discharges                                                                                                                                                                      | well controlled by lamotrigine                        |
| P12.1                  |                        | 2y2m                    | Seizures                                                           |                                                                                                                                                                                                | sodium valproate, lamotrigine                         |
| P13.1                  |                        | 42d                     | Myoclonic spasms                                                   | Intermittent pseudo periodic pattern and no epileptic discharges                                                                                                                               |                                                       |
|                        |                        | 2y4m                    | Brief episodes of tonic limb flexion associated with gaze fixation |                                                                                                                                                                                                |                                                       |
|                        |                        | 3y                      | Status epilepticus                                                 | Compatible with Lennox-Gastaut                                                                                                                                                                 | Well controlled by valproate, lamotrigine, clonazepam |
| P18.1                  |                        | 1m                      | Episode concerning for seizure                                     | No epileptiform activity                                                                                                                                                                       |                                                       |
|                        |                        | 1y3m                    | Episode concerning for seizure                                     | No epileptiform activity                                                                                                                                                                       |                                                       |
|                        |                        | 5y11m                   | Focal seizures                                                     | Multifocal spike discharges with atypical generalized spike waves and bitemporal slowing, and generalized paroxysmal fast activity with maximal impact at right temporo-parieto-occipital area | Well controlled by oxcarbazepine                      |
| F22 (5/15 individuals) | no information         |                         |                                                                    |                                                                                                                                                                                                |                                                       |
