# Supplementary material for: Gain and loss of TASK3 channel function and its regulation by novel variation cause KCNK9 imprinting syndrome
Source: PubMed Central journal article supplement (PMC9195326; doi:10.1186/s13073-022-01064-4), 2022-06-13
Supplement: 13073_2022_1064_MOESM7_ESM.pdf [file 13073_2022_1064_MOESM7_ESM.pdf]

# Gain and loss of TASK3 channel function and its regulation by novel variation cause *KCNK9* imprinting syndrome

## Additional file 7

**Table S3: A comparison of whole cell current density and reversal potentials between TASK3 clinical variants and matched WT controls.** Current density ( $\text{pA pF}^{-1}$ ) is measured as a difference of current (pA) seen at  $-40$  mV and  $-80$  mV, corrected for capacitance (pF). Error bars represent the 95% Confidence Intervals [CI] and the symbols represent individual data points. Current-voltage graphs were obtained from the averaged ramp changes in voltage between  $+20$  and  $-120$  mV for each variant and reversal potentials are expressed as the mean zero current level (mV)  $\pm$  [95% CI]. n represents the number of individual cells (box inset).

| Clinical Variant | Current Density ( $\text{pA pF}^{-1}$ ) | Current Voltage Relationship and reversal potentials ( $V_{\text{REV}}$ ) |
|------------------|-----------------------------------------|---------------------------------------------------------------------------|
| TASK3_G236R      |                                         |                                                                           |
| TASK3_R131C      |                                         |                                                                           |
| TASK3_R131H      |                                         |                                                                           |
| TASK3_R131P      |                                         |                                                                           |

**TASK3\_R131S**

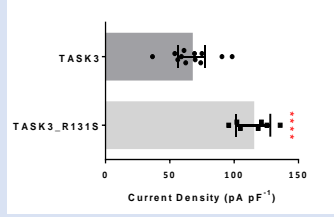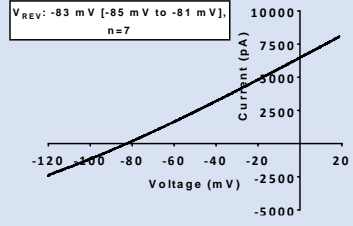

**TASK3\_M132R**

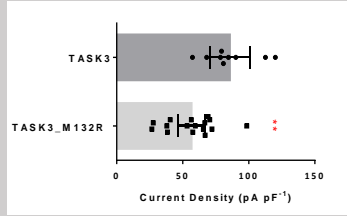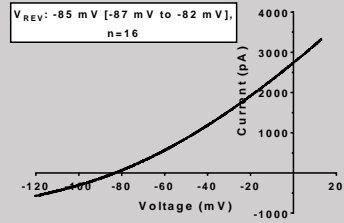

**TASK3\_F135deletion**

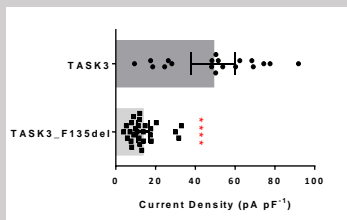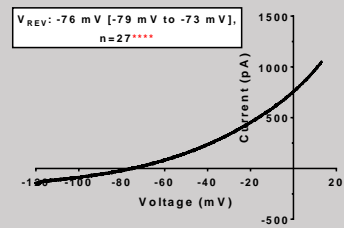

**TASK3\_M156V**

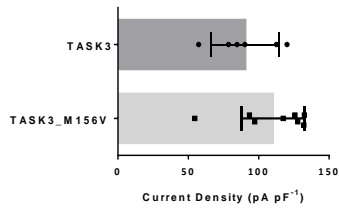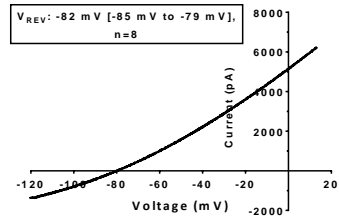

**TASK3\_M159I**

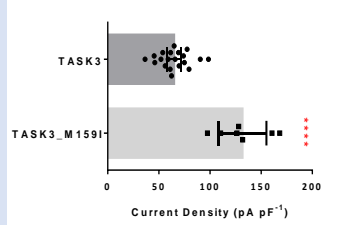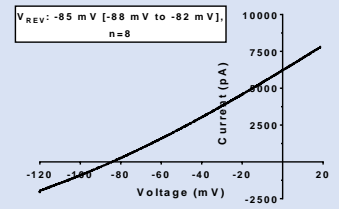

**TASK3\_F164C**

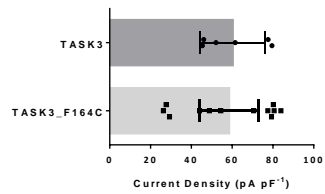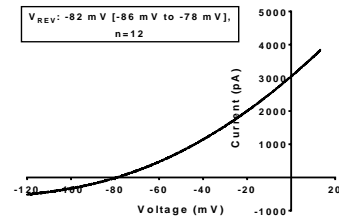

**TASK3\_T199A**

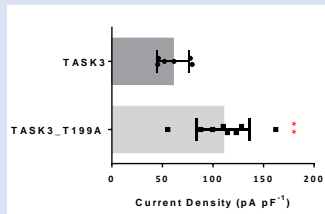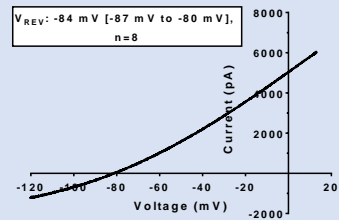

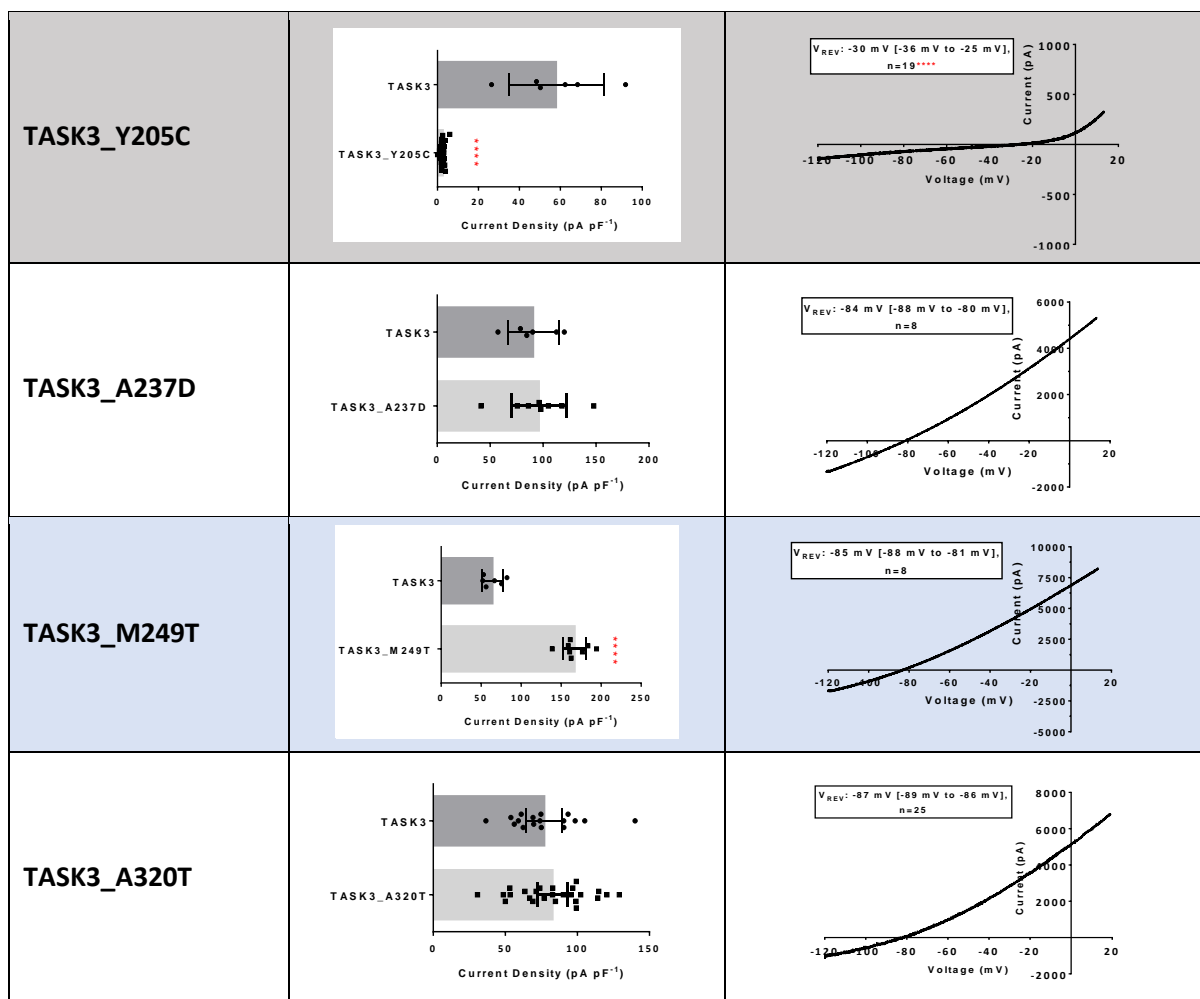

\* $p < 0.05$ , \*\* $p < 0.01$ , \*\*\* $p < 0.001$  and \*\*\*\* $p < 0.0001$  for between group differences determined using an unpaired Student's t-test. Boxes highlighted light blue represent a significant increase in current density, whilst grey highlighted boxes represent a significant decrease in current density and white highlighted boxes signify no recorded change in current density from WT. Abbreviations: mV – millivolt, pA – picoamp, pF – picofarad,  $V_{REV}$  – reversal potential.
